# Supplementary material
Source: publisher figshare collection journal article supplement (https://sage.figshare.com/ndownloader/files/14514137)
Supplement: Supplementary file 1 [file 14514137]

Supplementary File

*Factor Loadings (Study 1)*

| Items by Factor                                                                                                                            | F1         | F2   | F3   | F4   | F5   | F6   | F7   | F8   |
|--------------------------------------------------------------------------------------------------------------------------------------------|------------|------|------|------|------|------|------|------|
| <b>Factor 1: Social Comparison</b>                                                                                                         |            |      |      |      |      |      |      |      |
| I compare how supportive my partner is to other peoples' partners. (RSCM)                                                                  | <b>.80</b> | -.02 | -.02 | -.08 | -.05 | .08  | -.11 | .08  |
| I compare how considerate my partner is to how considerate other peoples' partners are. (RSCM)                                             | <b>.74</b> | .06  | -.09 | .01  | -.03 | .06  | -.13 | .08  |
| I think about how well my partner and I communicate with each other compared to how well other couples communicate with each other. (RSCM) | <b>.68</b> | .05  | -.09 | -.02 | .06  | -.03 | .01  | -.07 |
| I think about how dependable my partner is in comparison to other peoples' partners. (RSCM)                                                | <b>.67</b> | .09  | .02  | .02  | -.03 | -.08 | -.05 | .01  |
| I compare how my partner and I treat each other to how other couples treat each other. (RSCM)                                              | <b>.67</b> | .04  | .07  | -.01 | -.13 | -.01 | .03  | .11  |
| I think about how trustworthy my partner is in comparison to other peoples' partners. (RSCM)                                               | <b>.63</b> | .10  | -.01 | .06  | .06  | -.02 | -.29 | .06  |
| I think about how romantic my relationship is compared to how romantic other couples' relationships are. (RSCM)                            | <b>.61</b> | -.10 | -.01 | -.03 | .02  | .05  | .28  | -.10 |
| I pay a lot of attention to how well my partner and I resolve problems compared to how well other couples solve their problems. (RSCM)     | <b>.59</b> | .01  | .08  | .05  | -.02 | -.02 | -.02 | -.02 |
| I think about what types of activities my partner and I participate in together compared to what other couples do together. (RSCM)         | <b>.58</b> | -.06 | -.03 | .08  | .08  | -.08 | .11  | .04  |
| I think about how romantic my partner is in comparison to other peoples' partners. (RSCM)                                                  | <b>.56</b> | .05  | .09  | -.05 | -.06 | -.01 | .15  | -.01 |

|                                                                                                                                        |            |            |      |      |      |      |      |      |
|----------------------------------------------------------------------------------------------------------------------------------------|------------|------------|------|------|------|------|------|------|
| I compare the things that my partner does for me to what other peoples' partners do for them. (RSCM)                                   | <b>.53</b> | .04        | -.04 | .06  | -.06 | -.04 | .18  | .12  |
| I think about how successful my partner is in comparison to other peoples' partners. (RSCM)                                            | <b>.53</b> | -.03       | .05  | -.01 | .08  | .02  | -.07 | .04  |
| I observe the relationships of couples who are not as successful as mine. (RES)                                                        | <b>.52</b> | -.05       | .00  | .00  | .05  | .09  | .18  | -.17 |
| I think about couples who argue more than me and my partner. (New)                                                                     | <b>.52</b> | -.08       | .00  | -.02 | -.01 | .05  | .28  | -.18 |
| I compare how much time my partner and I spend together to how much time other couples spend together. (RSCM)                          | <b>.43</b> | .01        | .03  | .03  | .00  | -.10 | .15  | .12  |
| <b>Factor 2: Past Comparison</b>                                                                                                       |            |            |      |      |      |      |      |      |
| I compare my relationship with unhappy relationships I have had in the past. (RES)                                                     | -.06       | <b>.80</b> | -.07 | .01  | -.01 | -.03 | .08  | .06  |
| I compare how my current partner treats me to how my previous partner(s) treated me. (New)                                             | -.04       | <b>.77</b> | .10  | -.02 | -.05 | .12  | -.06 | .02  |
| I compare my current relationship to worse relationships I've had in the past. (New)                                                   | -.04       | <b>.77</b> | -.07 | .04  | .08  | -.09 | .15  | -.03 |
| I compare how satisfied I am with my current partner with how satisfied I was with my partner(s) in my previous relationship(s). (New) | -.05       | <b>.73</b> | .01  | .00  | .07  | .05  | -.03 | .03  |
| I compare my current partner to my previous partner(s) from my past relationship(s). (New)                                             | -.08       | <b>.72</b> | .01  | -.03 | -.04 | .14  | .04  | .11  |
| I think about relationships I've had in the past that were less satisfying than my current relationship. (New)                         | .01        | <b>.71</b> | -.02 | .02  | -.08 | -.07 | .06  | .01  |
| I compare how happy I am in my relationship with how happy I was in my previous relationship(s). (New)                                 | .00        | <b>.71</b> | -.03 | -.05 | -.03 | .17  | -.06 | .04  |
| I think about how much worse my life would be if I had stayed                                                                          | .06        | <b>.68</b> | -.05 | .00  | .10  | -.22 | .06  | -.09 |

with my previous partner(s).

(New)

|                                                                                                                                   |     |            |     |      |     |     |      |      |
|-----------------------------------------------------------------------------------------------------------------------------------|-----|------------|-----|------|-----|-----|------|------|
| I think about how well my current partner and I communicate compared to how well my previous partner(s) and I communicated. (New) | .10 | <b>.68</b> | .03 | -.02 | .01 | .03 | -.03 | -.13 |
|-----------------------------------------------------------------------------------------------------------------------------------|-----|------------|-----|------|-----|-----|------|------|

|                                                                                                     |     |            |      |     |     |     |     |      |
|-----------------------------------------------------------------------------------------------------|-----|------------|------|-----|-----|-----|-----|------|
| I compare how romantic my current partner is to how romantic my previous partner(s) was/were. (New) | .08 | <b>.63</b> | -.03 | .02 | .00 | .09 | .05 | -.02 |
|-----------------------------------------------------------------------------------------------------|-----|------------|------|-----|-----|-----|-----|------|

|                                                                                                                                  |     |            |     |     |     |      |      |      |
|----------------------------------------------------------------------------------------------------------------------------------|-----|------------|-----|-----|-----|------|------|------|
| I think about how supported I feel in my current relationship compared to how supported I have felt in past relationships. (New) | .21 | <b>.57</b> | .09 | .04 | .02 | -.01 | -.23 | -.02 |
|----------------------------------------------------------------------------------------------------------------------------------|-----|------------|-----|-----|-----|------|------|------|

### **Factor 3: Personal Standards**

|                                                                                                 |      |     |            |      |     |      |     |     |
|-------------------------------------------------------------------------------------------------|------|-----|------------|------|-----|------|-----|-----|
| I compare my current relationship to my own ideas about what makes an ideal relationship. (New) | -.02 | .05 | <b>.75</b> | -.05 | .00 | -.07 | .09 | .03 |
|-------------------------------------------------------------------------------------------------|------|-----|------------|------|-----|------|-----|-----|

|                                                                          |     |      |            |     |      |     |      |     |
|--------------------------------------------------------------------------|-----|------|------------|-----|------|-----|------|-----|
| I think about my own goals for what a relationship should be like. (New) | .00 | -.03 | <b>.70</b> | .05 | -.01 | .00 | -.05 | .06 |
|--------------------------------------------------------------------------|-----|------|------------|-----|------|-----|------|-----|

|                                                                                                          |      |      |            |      |      |      |     |     |
|----------------------------------------------------------------------------------------------------------|------|------|------------|------|------|------|-----|-----|
| I compare my own relationship to my own personal standards of what my relationship should be like. (RES) | -.01 | -.03 | <b>.70</b> | -.02 | -.08 | -.06 | .06 | .06 |
|----------------------------------------------------------------------------------------------------------|------|------|------------|------|------|------|-----|-----|

|                                                                        |      |     |            |     |      |     |      |     |
|------------------------------------------------------------------------|------|-----|------------|-----|------|-----|------|-----|
| I think about my idea of what defines a worthwhile relationship. (RES) | -.02 | .01 | <b>.68</b> | .03 | -.13 | .09 | -.11 | .14 |
|------------------------------------------------------------------------|------|-----|------------|-----|------|-----|------|-----|

|                                                                        |     |     |            |      |      |     |      |      |
|------------------------------------------------------------------------|-----|-----|------------|------|------|-----|------|------|
| I reflect on my own standards of what makes a good relationship. (RES) | .03 | .00 | <b>.67</b> | -.07 | -.01 | .05 | -.01 | -.13 |
|------------------------------------------------------------------------|-----|-----|------------|------|------|-----|------|------|

|                                                      |     |      |            |     |     |     |      |     |
|------------------------------------------------------|-----|------|------------|-----|-----|-----|------|-----|
| I think about what I want from a relationship. (New) | .02 | -.05 | <b>.62</b> | .02 | .05 | .02 | -.12 | .05 |
|------------------------------------------------------|-----|------|------------|-----|-----|-----|------|-----|

|                                                                           |      |      |            |     |     |      |     |     |
|---------------------------------------------------------------------------|------|------|------------|-----|-----|------|-----|-----|
| I think about how I would like my relationship to be in the future. (RES) | -.09 | -.04 | <b>.60</b> | .06 | .09 | -.17 | .03 | .10 |
|---------------------------------------------------------------------------|------|------|------------|-----|-----|------|-----|-----|

|                                         |      |      |            |     |     |     |     |     |
|-----------------------------------------|------|------|------------|-----|-----|-----|-----|-----|
| I envision my ideal relationship. (RES) | -.05 | -.09 | <b>.53</b> | .07 | .12 | .16 | .05 | .02 |
|-----------------------------------------|------|------|------------|-----|-----|-----|-----|-----|

|                                                                                 |     |     |            |      |     |     |     |      |
|---------------------------------------------------------------------------------|-----|-----|------------|------|-----|-----|-----|------|
| I compare my current partner to what I'm looking for in an ideal partner. (New) | .01 | .04 | <b>.53</b> | -.06 | .02 | .03 | .11 | -.01 |
|---------------------------------------------------------------------------------|-----|-----|------------|------|-----|-----|-----|------|

|                                                                                                                  |      |      |            |            |            |      |      |      |
|------------------------------------------------------------------------------------------------------------------|------|------|------------|------------|------------|------|------|------|
| I think about how well my current relationship matches my ideal relationship. (New)                              | .22  | .01  | <b>.53</b> | -.09       | .02        | .01  | -.04 | -.23 |
| I compare images of what my relationship is like, now to how I hope my relationship will be in the future. (RES) | -.03 | .07  | <b>.49</b> | .03        | .14        | -.12 | .16  | -.02 |
| <b>Factor 4: Feedback</b>                                                                                        |      |      |            |            |            |      |      |      |
| I ask my friends what they think of my relationship. (New)                                                       | -.03 | -.01 | -.02       | <b>.85</b> | -.02       | .08  | .00  | -.05 |
| I ask for input from my peers. (RES)                                                                             | -.09 | .02  | -.02       | <b>.84</b> | -.12       | -.03 | .09  | .01  |
| I find it useful to hear other peoples' opinions about my relationship. (New)                                    | .08  | -.03 | .03        | <b>.76</b> | -.02       | -.03 | -.05 | .00  |
| When I am unsure about how my relationship is going, I ask for others' opinions. (New)                           | -.04 | .08  | -.08       | <b>.74</b> | .06        | .01  | -.02 | .04  |
| I think about feedback from others I have received about my relationship. (RES)                                  | .09  | -.05 | .05        | <b>.68</b> | .03        | .06  | -.02 | -.04 |
| I remember what others have told me about the strengths and weaknesses of my relationship. (RES)                 | .11  | .00  | -.01       | <b>.55</b> | .09        | -.08 | .06  | .04  |
| <b>Factor 5: Feared Future</b>                                                                                   |      |      |            |            |            |      |      |      |
| I envision my 'worst fears' about what my relationship could be like in the future. (RES)                        | -.04 | -.05 | .10        | .02        | <b>.76</b> | .09  | -.05 | -.05 |
| I think about the "worst case scenario" for the future of my relationship. (New)                                 | .04  | .02  | .06        | .02        | <b>.75</b> | -.05 | -.04 | .01  |
| I think about what I fear the relationship could become in the future. (RES)                                     | .06  | -.09 | -.06       | .03        | <b>.72</b> | .10  | -.08 | .07  |
| I think about my partner leaving me. (New)                                                                       | -.12 | .10  | -.05       | -.06       | <b>.65</b> | -.06 | .12  | .04  |
| I compare my current relationship to what I fear my relationship could become. (RES)                             | .04  | .01  | -.02       | .01        | <b>.64</b> | .12  | .02  | -.03 |
| I think about what will happen if my current relationship ends. (New)                                            | .00  | .09  | .05        | -.07       | <b>.63</b> | -.07 | .04  | .10  |
| <b>Factor 6: Upward Past Comparison</b>                                                                          |      |      |            |            |            |      |      |      |

|                                                                                                                |      |      |      |      |      |            |            |            |
|----------------------------------------------------------------------------------------------------------------|------|------|------|------|------|------------|------------|------------|
| I think about relationships I've had in the past that were more satisfying than my current relationship. (New) | -.01 | -.03 | -.08 | -.06 | -.01 | <b>.75</b> | .12        | .10        |
| I compare my current relationship to better relationships I've had in the past. (New)                          | .02  | .01  | -.05 | -.02 | .10  | <b>.73</b> | .03        | .00        |
| I reflect on happy relationships I have had in the past. (RES)                                                 | -.07 | .11  | .08  | .10  | -.06 | <b>.72</b> | -.01       | -.09       |
| I compare my relationship now to my own previous happy relationships. (RES)                                    | -.02 | .17  | .08  | .00  | .01  | <b>.68</b> | .02        | -.04       |
| I think about positive experiences in my past relationships. (RES)                                             | .01  | .10  | .09  | .04  | -.03 | <b>.61</b> | -.02       | -.04       |
| I think about how much better my life would be if I had stayed with my previous partner(s). (New)              | .05  | -.07 | -.17 | .00  | .10  | <b>.61</b> | .04        | .13        |
| <b>Factor 7: Upward Social Comparison</b>                                                                      |      |      |      |      |      |            |            |            |
| I compare my relationship with other couples whose relationships are better than mine. (RSCM)                  | .12  | .01  | .00  | -.03 | -.03 | .08        | <b>.74</b> | .03        |
| I think about relationships that are more successful than mine. (New)                                          | .05  | .09  | -.01 | .00  | .02  | .03        | <b>.73</b> | .00        |
| I compare my relationship with other relationships that seem to be more successful than mine. (RES)            | .10  | -.02 | .00  | -.02 | -.02 | .08        | <b>.72</b> | .02        |
| I think about couples who are happier than me and my partner. (New)                                            | .05  | .00  | -.02 | .02  | .01  | .07        | <b>.69</b> | .10        |
| I observe couples who are happier in their relationships than I am. (RES)                                      | .08  | -.10 | -.03 | -.04 | .05  | .09        | <b>.65</b> | .15        |
| I think about couples that have been together longer than me and my partner. (New)                             | .09  | .08  | .06  | .05  | .03  | -.14       | <b>.57</b> | -.09       |
| I learn from experiences of people who have happier relationships than I do. (RES)                             | -.04 | -.01 | .09  | .21  | -.02 | .11        | <b>.46</b> | -.05       |
| <b>Factor 8: Negative Behavior</b>                                                                             |      |      |      |      |      |            |            |            |
| I think about how frequently my partner upsets me. (New)                                                       | .05  | -.02 | .01  | -.04 | .13  | -.01       | -.06       | <b>.80</b> |
| I think about how frequently my partner lets me down. (New)                                                    | -.07 | .08  | .04  | -.01 | .03  | -.01       | .13        | <b>.71</b> |

|                                                                          |     |      |     |      |     |     |     |            |
|--------------------------------------------------------------------------|-----|------|-----|------|-----|-----|-----|------------|
| I think about how frequently my partner annoys me. (New)                 | .04 | -.06 | .02 | -.01 | .02 | .09 | .05 | <b>.67</b> |
| I think about how frequently we disagree or argue with each other. (RES) | .08 | -.03 | .07 | .05  | .00 | .03 | .01 | <b>.66</b> |

---

*Note.* Source of item is indicated in parentheses. RSCM = Relationship Social Comparison Measure (Smith LeBeau & Buckingham, 2008), RES = Relationship Evaluation Scale (Wayment & Campbell, 2000), New = New item developed for this study.
